# Supplementary material for: Pri-miR526b and Pri-miR655 Are Potential Blood Biomarkers for Breast Cancer
Source: MDPI journal article supplement (doi:10.3390/cancers13153838), 2021-07-30
Supplement: s1 [file s1]

Supplementary

# Pri-miR526b and Pri-miR655 Are Potential Blood Biomarkers for Breast Cancer

Mousumi Majumder, Kingsley Chukwunonso Ugwuagbo, Sujit Maiti, Peeyush K Lala and Muriel Brackstone

**Table S1.** Clinical characteristics of breast cancer subject and control subject demographics of the samples from the Ontario Institute for Cancer Research.

| Characteristics       |                   | Control<br><i>n</i> = 20 | Breast Cancer<br><i>n</i> = 20 (100%) |
|-----------------------|-------------------|--------------------------|---------------------------------------|
| Sex                   | Male              | 0                        | 0                                     |
|                       | Female            | 20                       | 20                                    |
| Age (years)           | Mean ± SD (range) | 54.39 ± 16.95 (27-87)    | 67.25 ± 18.17 (32-92)                 |
| Tumor Receptor Status | ER+ve (%)         |                          | 15 (75.00)                            |
|                       | ER-ve (%)         |                          | 2 (11.11)                             |
|                       | PR+ve (%)         |                          | 14 (70.00)                            |
|                       | PR-ve (%)         |                          | 3 (15.00)                             |
|                       | HER2+ve (%)       |                          | 3 (15.00)                             |
|                       | HER2-ve (%)       |                          | 12 (60.00)                            |
| T-N-M (Tumor) Staging | 0                 |                          | 1 (5.00)                              |
|                       | I                 |                          | 1 (5.00)                              |
|                       | II                |                          | 13 (65.00)                            |
|                       | III               |                          | 5 (25.00)                             |
